# Supplementary material for: Modeling simulation of aerosol light absorption over the Beijing-Tianjin-Hebei region: the impact of mixing state and aging processes
Source: Copernicus journal article supplement (doi:10.5194/egusphere-2024-1432), 2024-08-09
Supplement: Supplementary file 1 [file egusphere-2024-1432-supplement.pdf]

**Table S1 Configuration of WRF-NAQPMS-APM**

| <b>Configuration</b>    | <b>Description</b>              |
|-------------------------|---------------------------------|
| Horizontal resolution   | 27 km, 9 km                     |
| Vertical layers         | 30                              |
| Microphysics            | Lin (Lin et al., 1983)          |
| Short-wave radiation    | Goddard (Chou and Suarez, 1994) |
| Long-wave radiation     | Goddard (Mlawer et al., 1997)   |
| Land-surface            | Noah (Chen and Dudhia, 2001).   |
| Boundary layer          | YSU (Hong et al., 2006)         |
| Cumulus                 | New Grell                       |
| Anthropogenic emission  | MEIC (Li et al., 2017)          |
| Gas chemistry           | CBMZ (Zaveri and Peters, 1999)  |
| SOA                     | VBS (Yang et al., 2019)         |
| Heterogeneous chemistry | Li et al., 2018                 |
| Microphysics            | APM (Chen et al., 2014)         |
| Dry deposition          | Wesely                          |

**Table S2 List of physical and chemical properties of species concerned in FlexAOD**

| Species           | Density<br>(g/cm <sup>3</sup> ) | Refractive<br>index<br>@550nm | Mean radius<br>( $\mu\text{m}$ ) | Standard<br>deviation | Growth<br>factor at<br>RH=80% |
|-------------------|---------------------------------|-------------------------------|----------------------------------|-----------------------|-------------------------------|
| Sulfate           | 1.77                            | 1.53-0.06i                    | 0.05                             | 2                     | 1.64                          |
| Nitrate           | 1.73                            | 1.53-0.06i                    | 0.065                            | 2                     | 1.64                          |
| Secondary organic | 1.3                             | 1.43                          | 0.095                            | 1.5                   | 1.64                          |
| Primary organic   | 1.47                            | 1.63-0.021i                   | 0.12                             | 1.3                   | 1                             |
| BC                | 1.8                             | 1.85-0.71i                    | 0.03                             | 1.8                   | 1                             |
| PPM               | 2.65                            | 1.56-0.014i                   | 0.31                             | 1.5                   | 1                             |
| Fine dust         | 2.5                             | 1.56-0.014i                   | 1.9                              | 2.2                   | 1                             |

**Table S3 Formula of statistic parameters used in this study**

| <b>Statistical parameter</b>                                               | <b>Calculation formula</b>                                                                                   |
|----------------------------------------------------------------------------|--------------------------------------------------------------------------------------------------------------|
| R (Correlation Coefficient)                                                | $R = \frac{\{\sum_{i=1}^N (M_i - MM)(O_i - MO)\}}{\{\sum_{i=1}^N (M_i - MM)^2 (O_i - MO)^2\}^{\frac{1}{2}}}$ |
| FAC2<br>(Fraction of data that satisfy $0.5 \leq \frac{M_i}{O_i} \leq 2$ ) | FAC2= NV/N                                                                                                   |
| NMB (Normalized Mean Bias)                                                 | $NMB = \left[ \sum_{i=1}^N  M_i - O_i  \right] / \sum_{i=1}^N O_i$                                           |
| MFB (Mean Fractional Bias)                                                 | $MFB = \frac{1}{N} \sum_{i=1}^N \frac{(M_i - O_i)}{[(M_i + O_i)/2]}$                                         |
| MFE (Mean Fractional Error)                                                | $MFE = \frac{1}{N} \sum_{i=1}^N \frac{ M_i - O_i }{[(M_i + O_i)/2]}$                                         |

10

**Table S4 Statistic parameters between observed and simulated PM<sub>2.5</sub>**

| <b>Parameter</b>      | <b>Beijing</b> | <b>Tangshan</b> | <b>Tianjin</b> | <b>Baoding</b> | <b>Hengshui</b> | <b>Zhengzhou</b> | <b>Benchmark</b>      |
|-----------------------|----------------|-----------------|----------------|----------------|-----------------|------------------|-----------------------|
| R                     | 0.75           | 0.69            | 0.76           | 0.65           | 0.70            | 0.55             | >0.40 <sup>a</sup>    |
| NMB                   | -0.01          | -0.09           | -0.18          | -0.22          | -0.14           | 0.13             | ≤ ± 0.3 <sup>a</sup>  |
| PM <sub>2.5</sub> IOA | 0.85           | 0.83            | 0.85           | 0.72           | 0.80            | 0.72             |                       |
| MFB                   | 0.12           | -0.18           | -0.21          | -0.17          | -0.13           | 0.15             | ≤ ± 0.6 <sup>b</sup>  |
| MFE                   | 0.50           | 0.44            | 0.41           | 0.44           | 0.32            | 0.41             | ≤ ± 0.75 <sup>b</sup> |

<sup>a</sup> Emery et al., 2016

<sup>b</sup> Boylan and Russell. 2006

## References

15 Boylan, J. W., and Russell, A. G.: PM and light extinction model performance metrics, goals, and criteria for three-dimensional air quality models, Atmospheric Environment, 40, 4946-4959, 10.1016/j.atmosenv.2005.09.087, 2006.

- Chen, F., and Dudhia, J.: Coupling an advanced land surface-hydrology model with the Penn State-NCAR MM5 modeling system. Part I: Model implementation and sensitivity, *Mon Weather Rev*, 129, 569-585, Doi 10.1175/1520-0493(2001)129<0569:Caalsh>2.0.Co;2, 2001.
- 20 Chen, X. S., Wang, Z. F., Li, J., and Yu, F. Q.: Development of a Regional Chemical Transport Model with Size-Resolved Aerosol Microphysics and Its Application on Aerosol Number Concentration Simulation over China, *Sola*, 10, 83-87, 10.2151/sola.2014-017, 2014.
- Emery, C., Liu, Z., Russell, A., Odman, M., Yarwood, G., and Kumar, N.: Recommendations on Statistics and Benchmarks to Assess Photochemical Model Performance, *Journal of the Air & Waste Management Association* (1995), 67, 10.1080/10962247.2016.1265027, 2016.
- 25 Hong, S. Y., Noh, Y., and Dudhia, J.: A new vertical diffusion package with an explicit treatment of entrainment processes, *Mon Weather Rev*, 134, 2318-2341, Doi 10.1175/Mwr3199.1, 2006.
- Li, M., Liu, H., Geng, G. N., Hong, C. P., Liu, F., Song, Y., Tong, D., Zheng, B., Cui, H. Y., Man, H. Y., Zhang, Q., and He, K. B.: Anthropogenic emission inventories in China: a review, *Natl Sci Rev*, 4, 834-866, 10.1093/nsr/nwx150, 2017.
- Lin, Y. L., Farley, R. D., and Orville, H. D.: Bulk Parameterization of the Snow Field in a Cloud Model, *Journal of Climate and Applied Meteorology*, 22, 1065-1092, Doi 10.1175/1520-0450(1983)022<1065:Bpotsf>2.0.Co;2, 1983.
- 30 MD, C., and MJ., S.: An efficient thermal infrared radiation parameterization for use in general circulation models, Maryland, USA, 85, 1994.
- Mlawer, E. J., Taubman, S. J., Brown, P. D., Iacono, M. J., and Clough, S. A.: Radiative transfer for inhomogeneous atmospheres: RRTM, a validated correlated-k model for the longwave, *Journal of Geophysical Research-Atmospheres*, 35 102, 16663-16682, Doi 10.1029/97jd00237, 1997.
- Yang, W., Li, J., Wang, W., Li, J., Ge, M.-F., Sun, Y., Chen, X., Ge, B., Tong, S., Wang, Q., and Wang, Z.: Investigating secondary organic aerosol formation pathways in China during 2014, *Atmospheric Environment*, 213, 133-147, 10.1016/j.atmosenv.2019.05.057, 2019.
- Zaveri, R. A., and Peters, L. K.: A new lumped structure photochemical mechanism for large-scale applications, *Journal of* 40 *Geophysical Research-Atmospheres*, 104, 30387-30415, Doi 10.1029/1999jd900876, 1999.
